# Supplementary material
Source: ML conference proceedings conference paper supplement (https://openreview.net/forum?id=RUQ1zwZR8_)
Supplement: supplementary_material [file attachment]

| Task        | $z^*$ | $C^*$ | adaptive | fixed |
|-------------|-------|-------|----------|-------|
| CIFAR-100   | 0.03  | 0.98  | 55.1     | 55.1  |
| EMNIST-CR   | 0.10  | 0.37  | 85.0     | 84.8  |
| EMNIST-AE   | 0.03  | 0.32  | 0.080    | 0.083 |
| SHAKESPEARE | 0.10  | 0.95  | 56.4     | 56.3  |
| SO-NWP      | 0.01  | 0.30  | 24.4     | 24.4  |
| SO-LR       | 0.01  | 16.0  | 51.5     | 56.1  |

Table 2: For each task, with the maximum noise possible before performance begins to significantly degrade ( $z^*$ ), the best fixed clip ( $C^*$ ) chosen on the development set, and the test set performance of adaptive clipping to the median compared to fixed clipping to  $C^*$ . In practice, finding the best fixed clipping norm would require substantial additional hyperparameter tuning.

| Task        | adaptive ( $\mu, \sigma$ ) |        | fixed ( $\mu, \sigma$ ) |         |
|-------------|----------------------------|--------|-------------------------|---------|
| CIFAR-100   | 54.8                       | 0.50   | 54.5                    | 0.40    |
| EMNIST-CR   | 83.3                       | 1.2    | 83.3                    | 1.3     |
| EMNIST-AE   | 0.0804                     | 0.0016 | 0.0820                  | 0.00050 |
| SHAKESPEARE | 56.3                       | 0.88   | 56.2                    | 0.89    |
| SO-NWP      | 24.2                       | 0.43   | 24.2                    | 0.49    |
| SO-LR       | 54.5                       | 2.9    | 55.9                    | 1.5     |

Table 3: For each task, the mean ( $\mu$ ) and standard deviation ( $\sigma$ ) test set performance of adaptive clipping to the median compared to fixed clipping to the optimal  $C^*$  over 20 independent runs. The randomness comes from both the Gaussian noise added for DP and the selection of clients for each round.

## 1 A Appendix

2 To be more confident that the results of Table 2 (duplicated here for easy comparison) were not due to  
3 chance, we repeated the final test experiments 20 times for each task and clipping style, varying the  
4 random seed used to select clients at each round and to generate the Gaussian noise for differential  
5 privacy. The mean and standard deviation of the evaluation metrics as computed on the test set are  
6 shown in Table 3.

7 We observe that adaptive clipping to the median performs comparably to fixed clipping to the optimal  
8 norm chosen in hindsight on all of the tasks. Indeed, this experiment demonstrates that some of the  
9 large performance gap observed on the SO-LR task from Table 2 is likely due to the high variance.
